# Supplementary material for: Low oxygen post conditioning prevents thalamic secondary neuronal loss caused by excitotoxicity after cortical stroke
Source: PubMed Central journal article supplement (PMC6425023; doi:10.1038/s41598-019-39493-8), 2019-03-19
Supplement: 41598_2019_39493_MOESM1_ESM.pdf [file 41598_2019_39493_MOESM1_ESM.pdf]

# **Low Oxygen Post Conditioning prevents thalamic secondary neuronal loss caused by excitotoxicity after cortical stroke**

## ***Authors:***

Giovanni Pietrogrande, Katarzyna Zalewska, Zidan Zhao, Mahmoud Abdolhoseini, Wei Zhen Chow, Sonia Sanchez-Bezanilla , Lin Kooi Ong, Sarah J Johnson, Michael Nilsson, Frederick R Walker

## ***Supplementary Information***

A

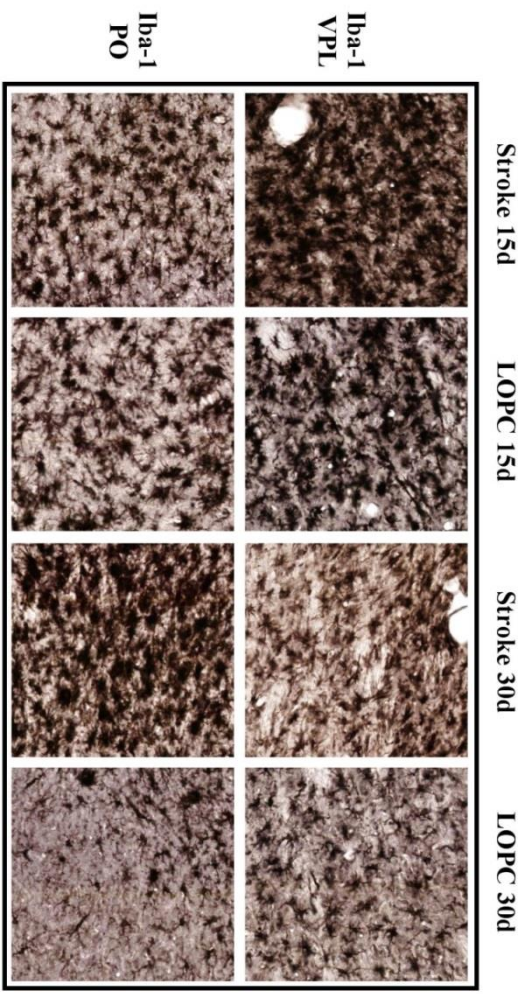

B

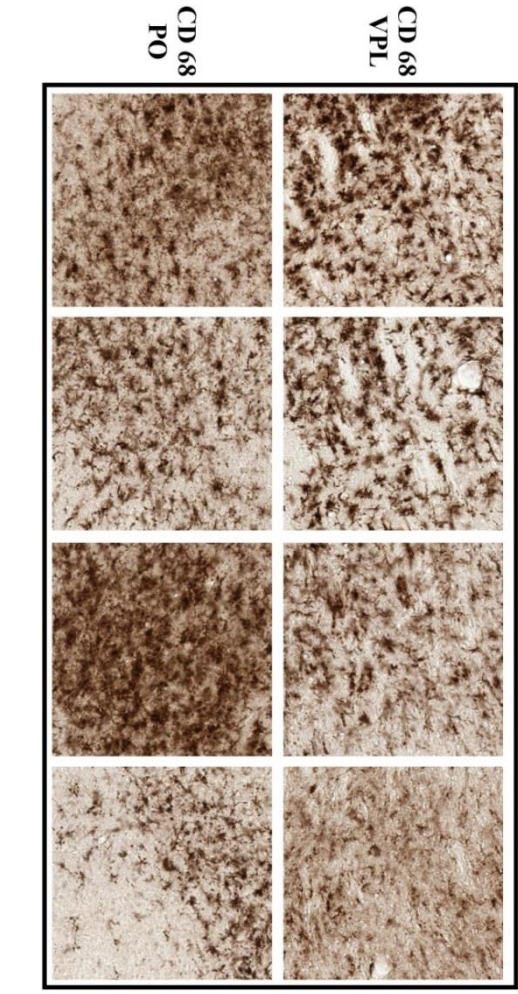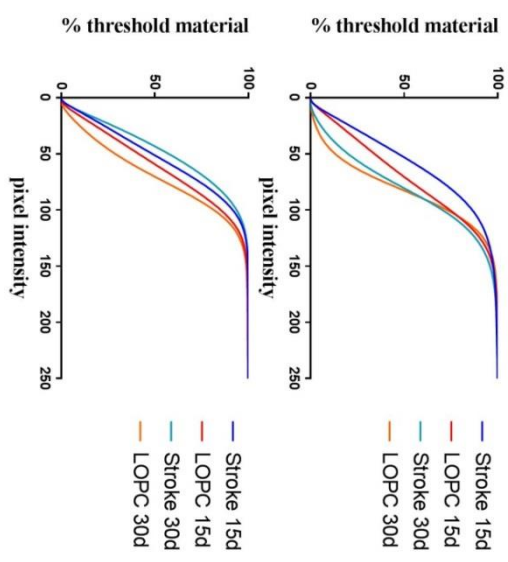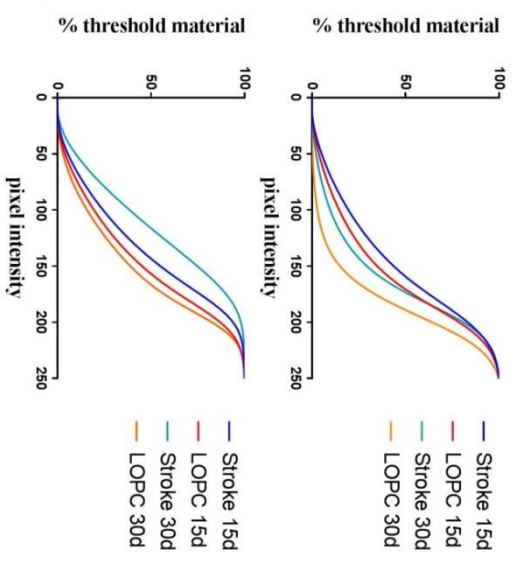

**Supp Fig 1. Quantification of immunolabelling for Iba1 and CD68 in the PO and VPL.**

Cumulative thresholding analysis of the intensity of immunolabelling confirms general decrease in the levels of microglia activation at 30 days after LOPC compared to stroke alone.

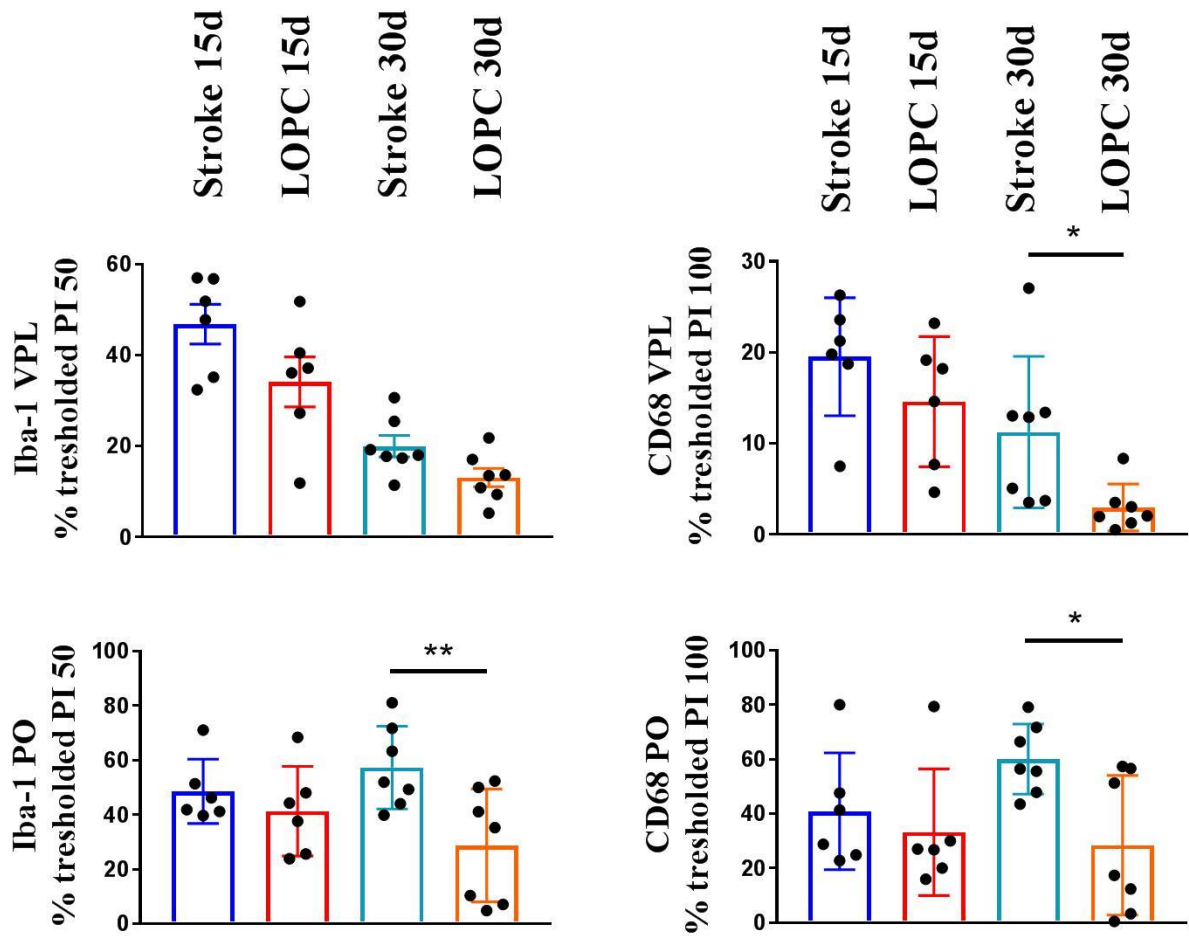

**Supp Fig 2. Specific quantification of cumulative thresholding.** Analysis of the thresholded material of Iba-1 and CD68 staining in the VPL and PO. The optimal pixel intensity (PI) was assessed manually.

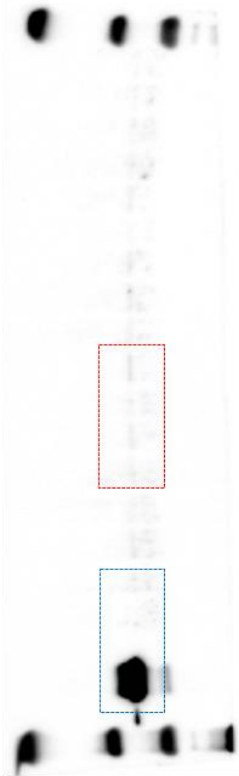

B-ACTIN

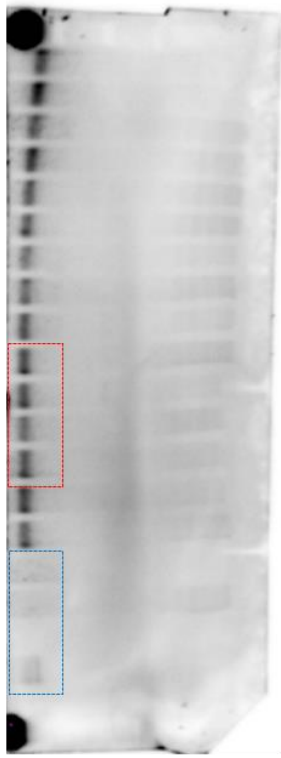

PSD-95

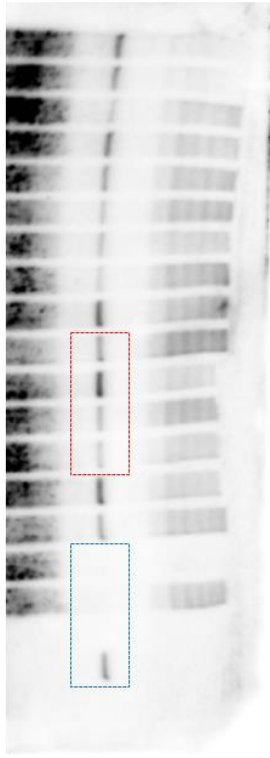

N2B

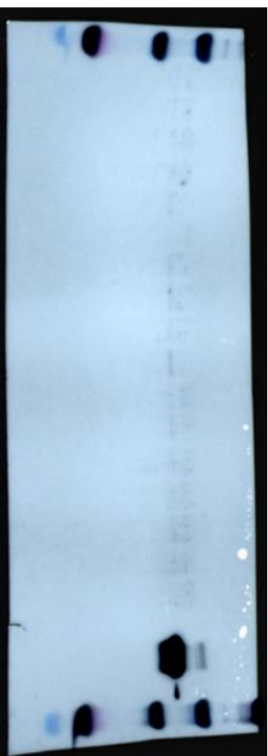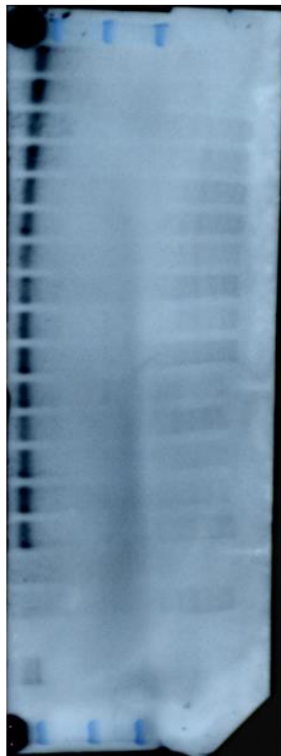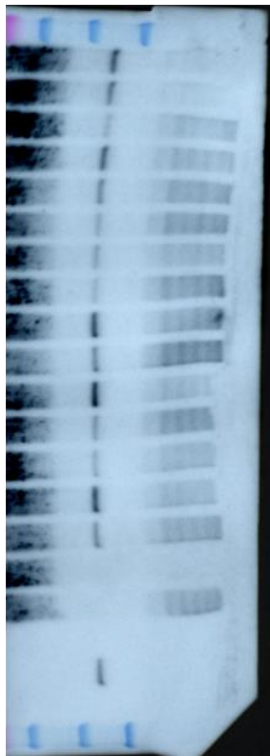

**Supp Fig 3. CO-IP original western blot.** Picture of the original western blot cropped for Fig. 5c and overlay with white light for molecular weight marker (Bio Rad, Cat# 161-0374) visualization. Loading order: Stroke1, Stroke2, LOPC1, LOPC2, Stroke3, Stroke4, LOPC 3, LOPC4, Stroke5, Stroke6, Stroke7, LOPC5, LOPC6, LOPC7, LOPC8, -Ab, -Lys, empty lane, 1 $\mu$ g Stroke thalamus lysate. Red box highlights the left part of panel Fig 5c, blue box the right panel of Fig 5c.

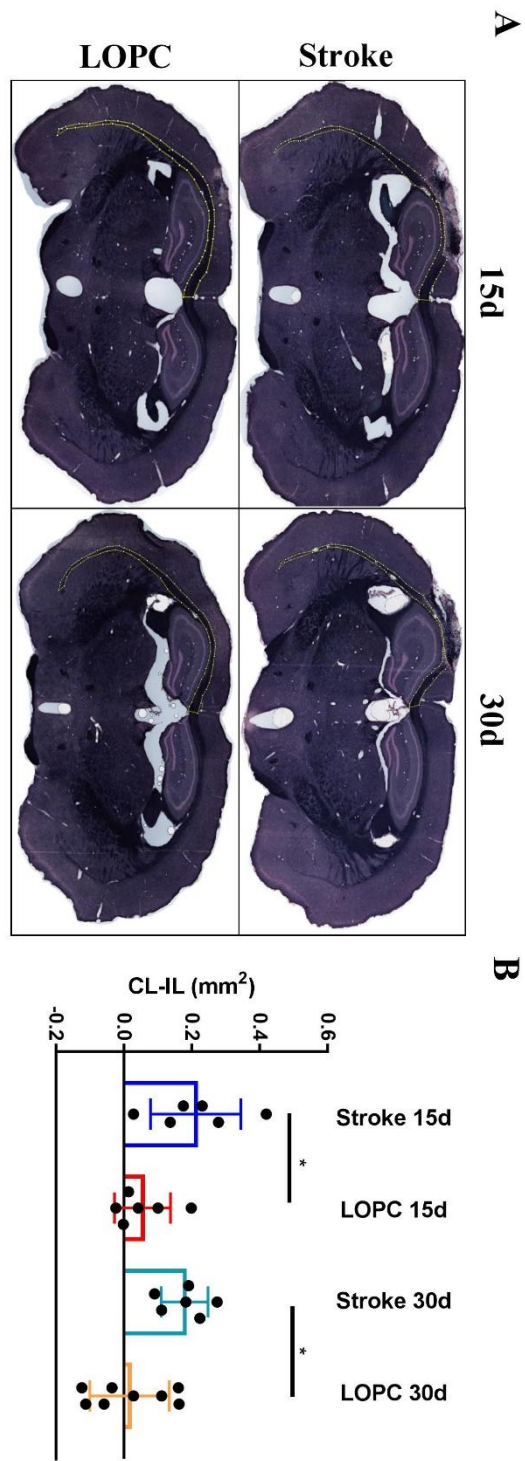

**Supp Fig.4 LOPC ameliorates white matter loss.** (A) Sudan Black B staining at Bregma levels -1.5. Yellow line represents the corpus callosum traced using ImageJ. (B) Quantification of corpus callosum area measured as a difference between the contralateral (CL) and ipsilateral (IL) hemisphere revealed a significant decrease in white matter structural loss at both 15 and 30 days post-stroke. Results are shown as the mean  $\pm$  SD. \*  $p < 0.05$ , Mann Whitney U test.
